# Supplementary material for: Ci-Symmetry, [2 × 2] grid, square copper complex with the N4,N5-bis(4-fluorophenyl)-1H-imidazole-4,5-dicarboxamide ligand: structure, catecholase activity, magnetic properties and DFT calculations
Source: Royal Society of Chemistry journal article supplement (doi:10.1039/c7nj01667k), 2017-01-01
Supplement: c7nj01667k1.pdf [file c7nj01667k1.pdf]

New Journal of Chemistry

Electronic supplementary information

***C*-symmetry, [2 × 2] grid, square copper complex with the *N*<sup>4</sup>,*N*<sup>5</sup>-bis(4-fluorophenyl)-1*H*-imidazole-4,5-dicarboxamide ligand. Structure, catecholase activity, magnetic properties and DFT calculations**

Arfa Parween, Sumita Naskar, Antonio J. Mota,\* Arturo Espinosa Ferao, Shyamal Kumar Chattopadhyay  
Eric Riviere,\* William Lewis, Subhendu Naskar\*

|                                                                                                                                                                                                                        | Pg. No. |
|------------------------------------------------------------------------------------------------------------------------------------------------------------------------------------------------------------------------|---------|
| <b>Figure S1:</b> IR spectrum of the ligand <b>LH<sub>3</sub></b> .                                                                                                                                                    | 2       |
| <b>Figure S2:</b> Mass spectrum of the ligand <b>LH<sub>3</sub></b> .                                                                                                                                                  | 3       |
| <b>Figure S3:</b> <sup>1</sup> H NMR spectrum of the ligand <b>LH<sub>3</sub></b> .                                                                                                                                    | 4       |
| <b>Figure S4:</b> <sup>13</sup> C NMR spectrum of the ligand <b>LH<sub>3</sub></b> .                                                                                                                                   | 5       |
| <b>Figure S5:</b> IR spectrum of the tetranuclear copper complex <b>Cu<sub>4</sub>(LH)<sub>4</sub>·4DMF</b><br>6                                                                                                       | 6       |
| <b>Figure S6:</b> Thermogravimetric analysis of the desolvated tetranuclear copper complex [Cu <sub>4</sub> (LH) <sub>4</sub> ]                                                                                        | 7       |
| <b>Figure S7:</b> Plots of the oxidation of 3,5-DTBC catalyzed by Cu <sub>4</sub> (LH) <sub>4</sub> : (a) initial rates versus substrate concentration; (b) Lineweaver–Burk plot.                                      | 8       |
| <b>Figure S8:</b> Cyclic voltammograms of <b>LH<sub>3</sub></b> and <b>Cu<sub>4</sub>(LH)<sub>4</sub></b> in DMF solution, with TBAP as supporting electrolyte, in glassy carbon electrode at 100 mV/s <sup>-1</sup> . | 9       |
| <b>Table S1:</b> Selected bond lengths (Å) and bond angles (°) for the tetranuclear unit <b>Cu<sub>4</sub>(LH)<sub>4</sub>·4DMF</b>                                                                                    | 10      |
| <b>Table S2:</b> Selected calculated spin densities for the <b>Cu<sub>4</sub>(LH)<sub>4</sub>·4DMF</b> complex                                                                                                         | 11      |

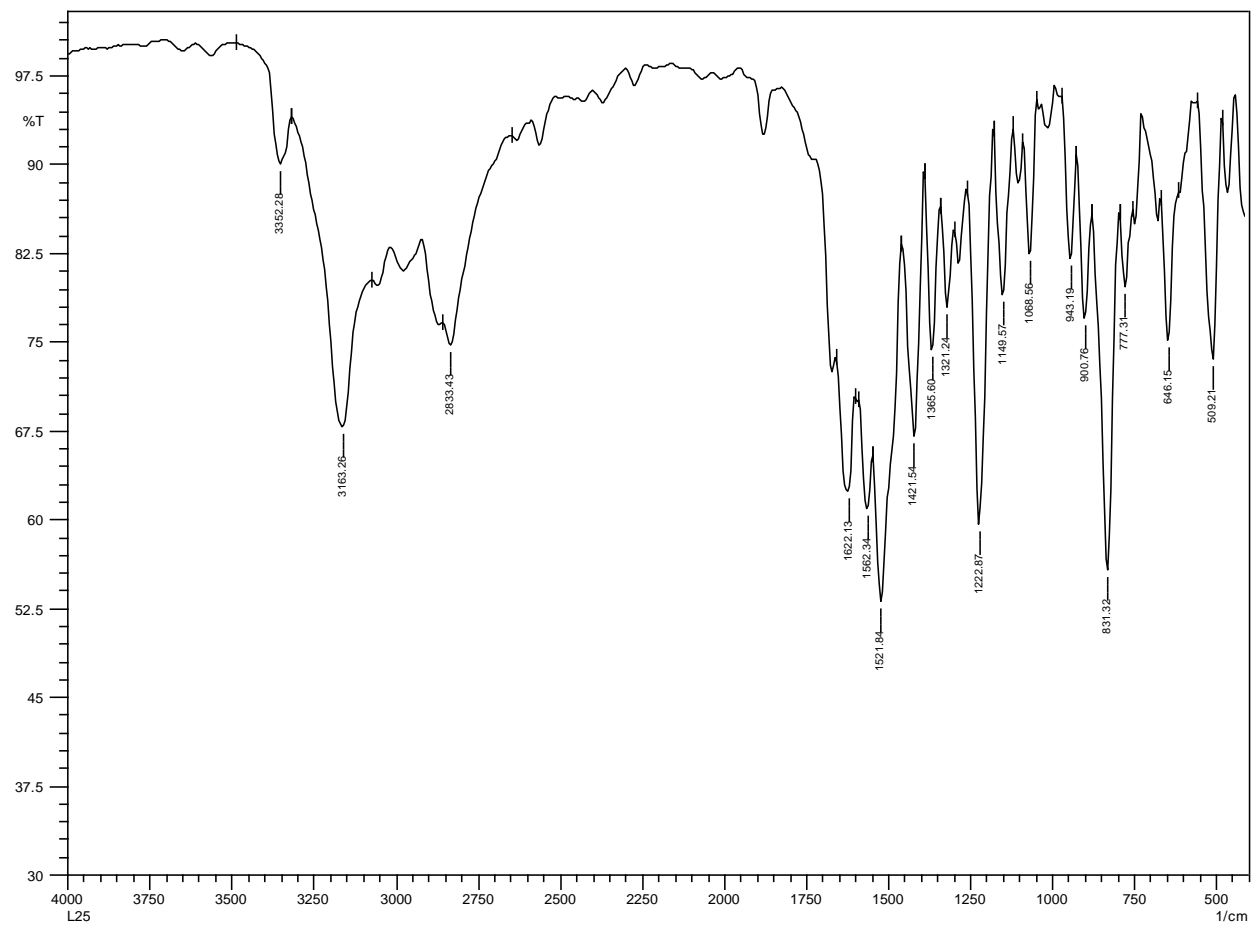

**Figure S1:** IR spectrum of the ligand LH<sub>3</sub>.

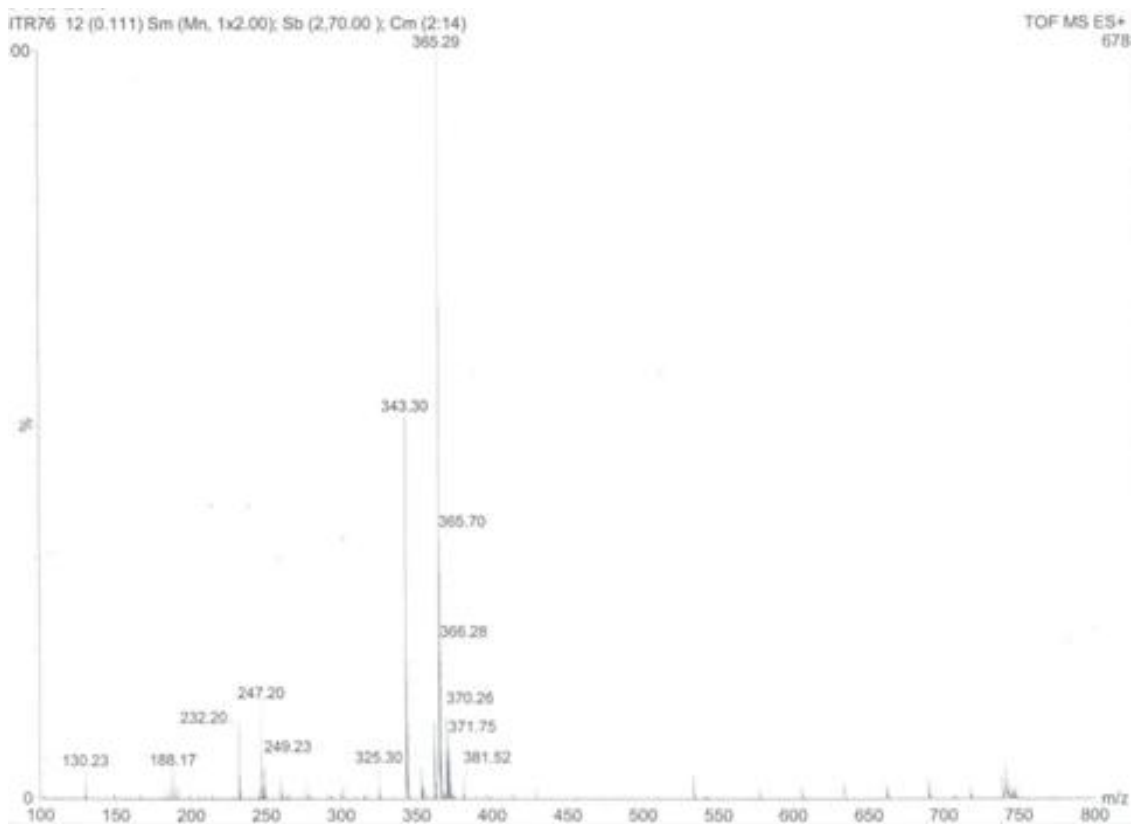

**Figure S2:** Mass spectrum of the ligand  $LH_3$ .

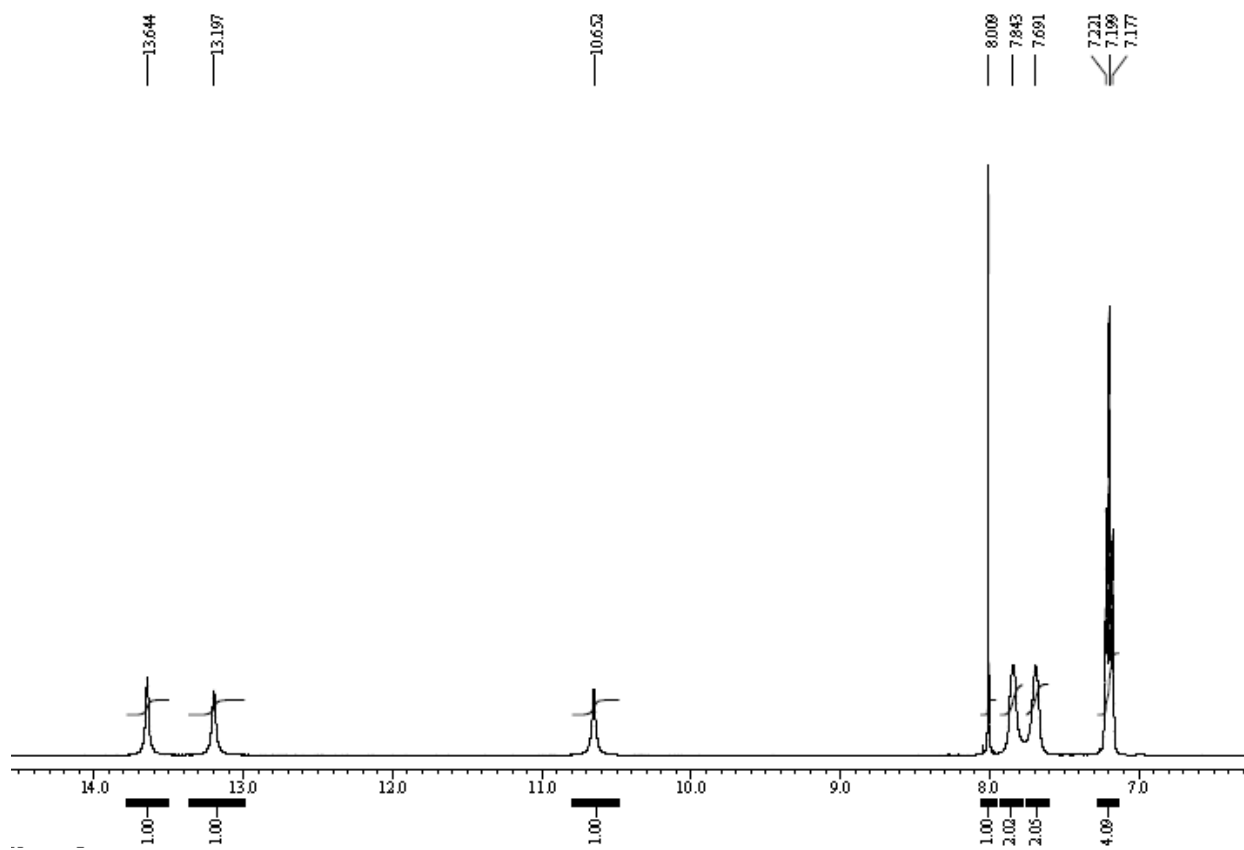

**Figure S3:**  $^1\text{H}$  NMR spectrum of the ligand  $\text{LH}_3$ .

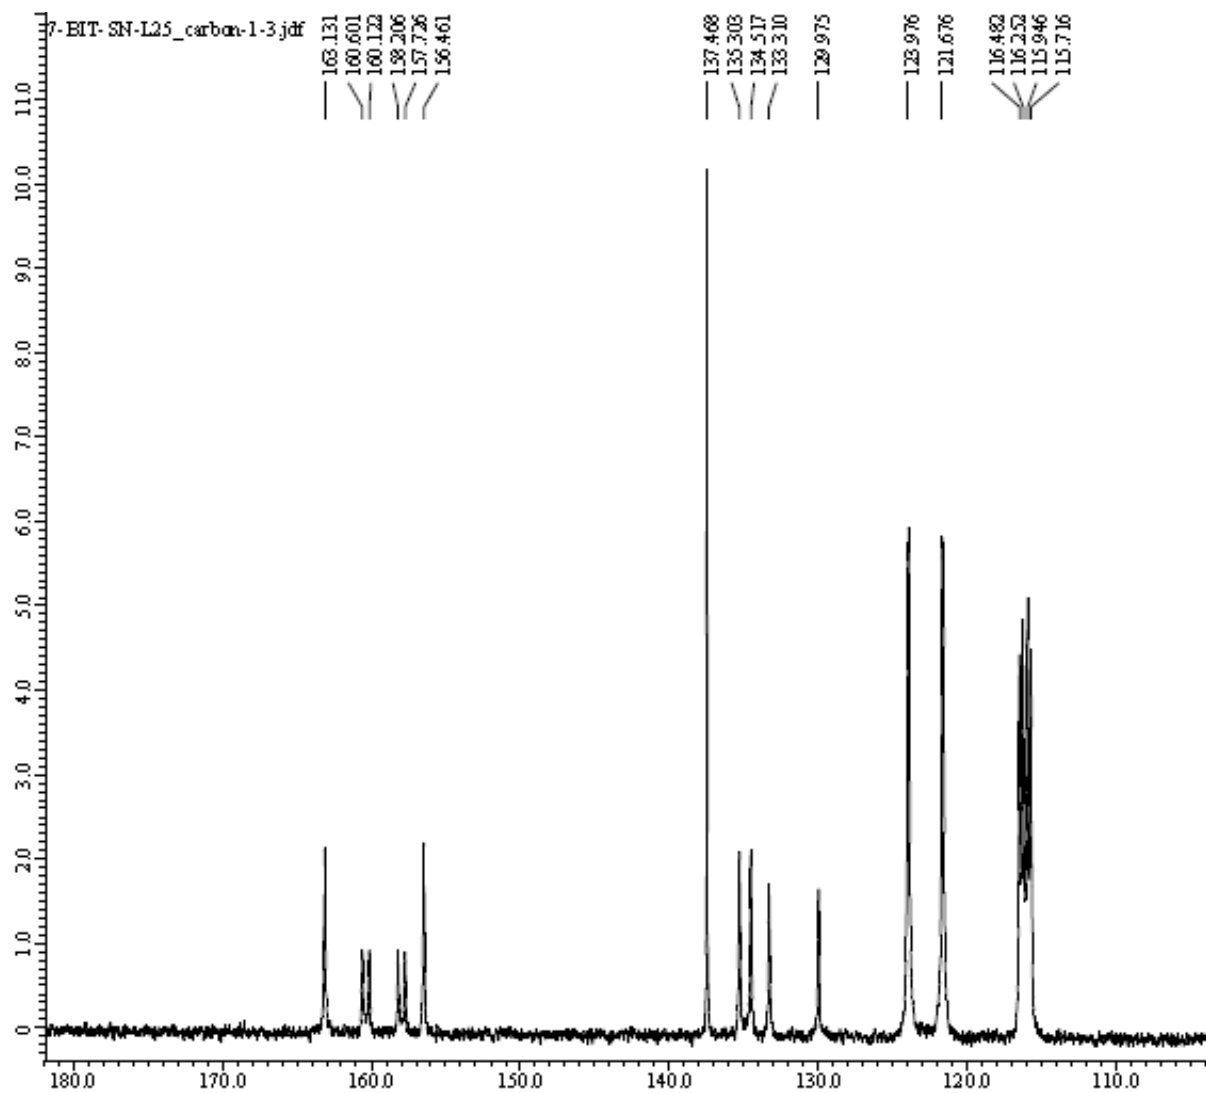

Figure S4:  $^{13}\text{C}$  NMR spectrum of the ligand  $\text{LH}_3$ .

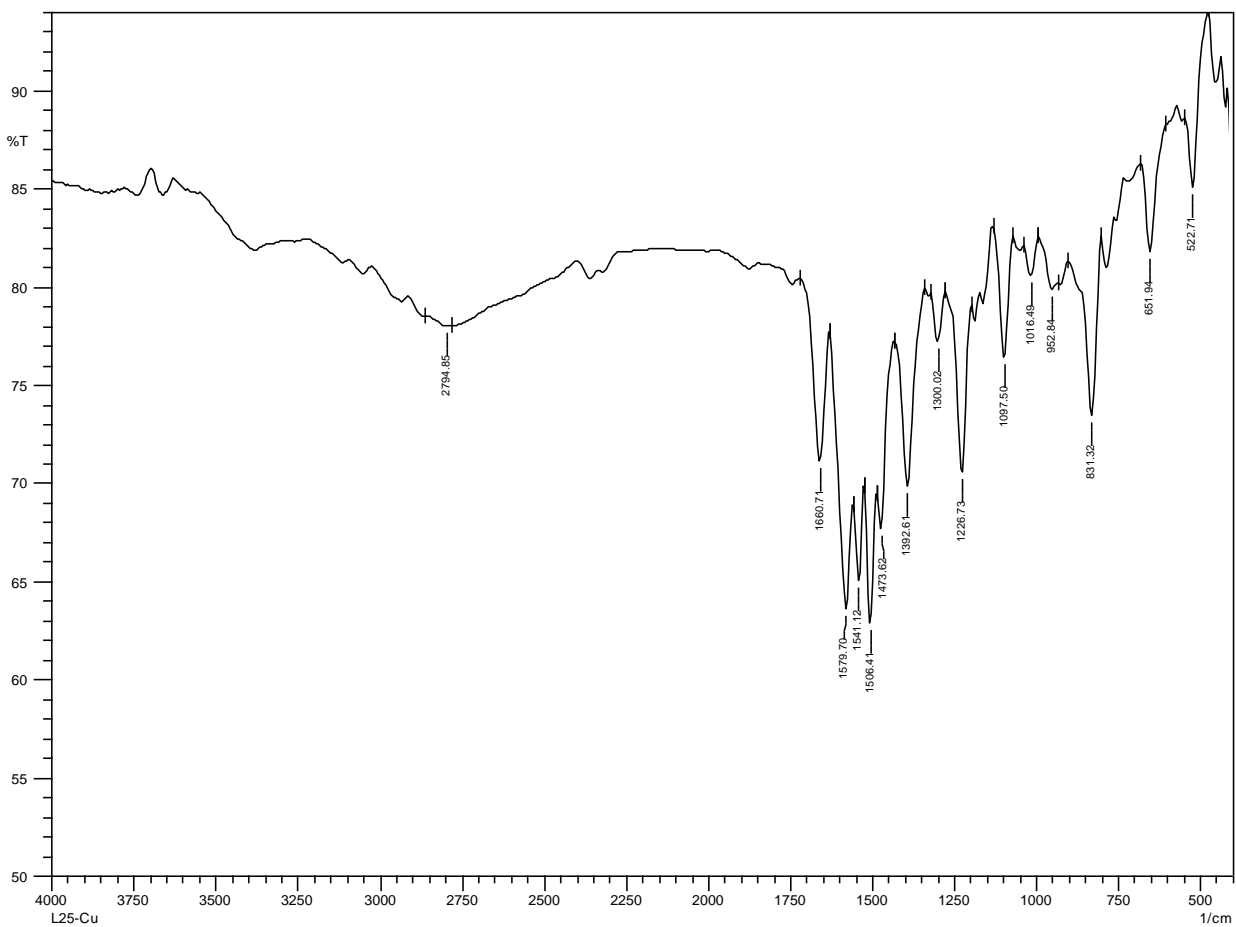

**Figure S5:** IR spectrum of the tetranuclear copper complex  $\text{Cu}_4(\text{LH})_4$

The thermogravimetric analysis was performed on a powder sample which is devoid of the solvent molecules. The thermogram was monitored in the temperature range 30-800 °C and shows that a weight loss of 81.05% (**Figure S5**) took place in the temperature range of 200-515 °C corresponding to the loss of four molecule of amide ligand (calculated 84.27%). The rest residue is metal.

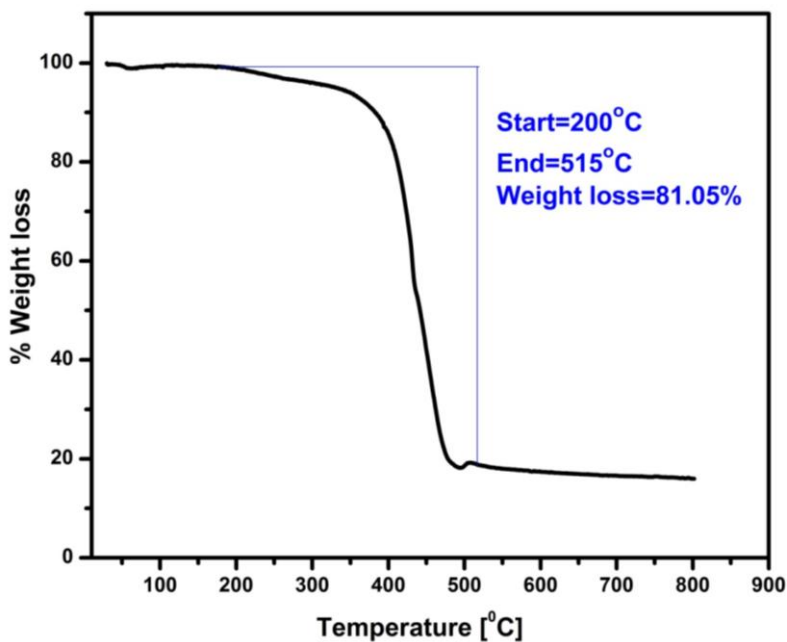

**Figure S6:** Thermogram of the desolvated tetranuclear copper complex  $[\text{Cu}_4(\text{LH})_4]$ .

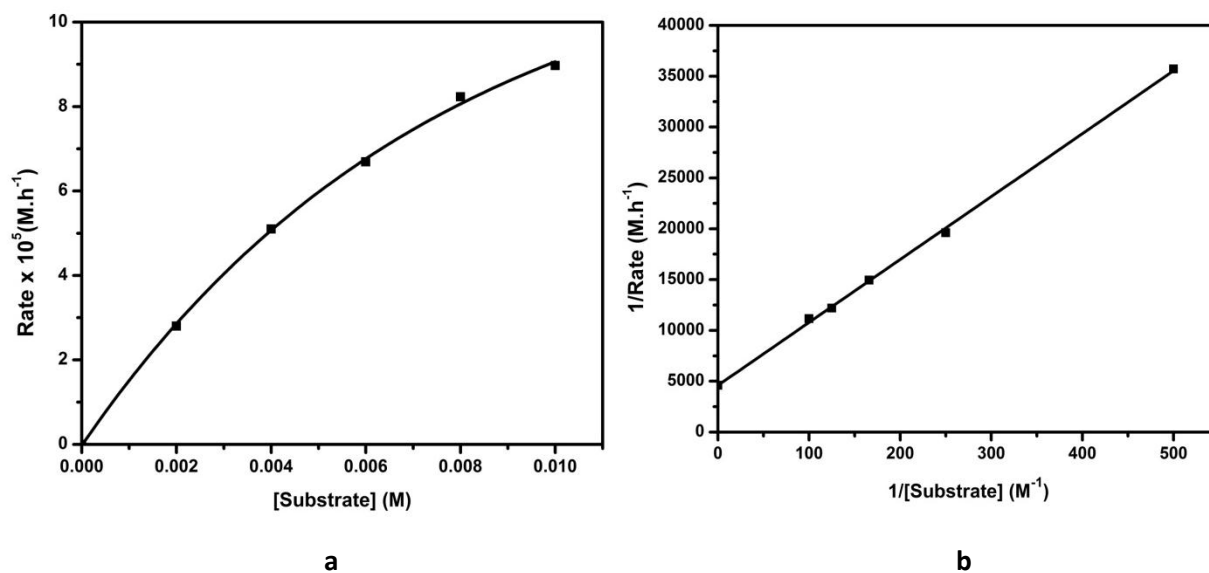

**Figure S7:** Plot of the initial rates versus substrate concentration for the oxidation of 3,5-DTBC catalyzed by  $\text{Cu}_4(\text{LH})_4$  : (a) initial rates versus substrate concentration; (b) Lineweaver-Burk plot.



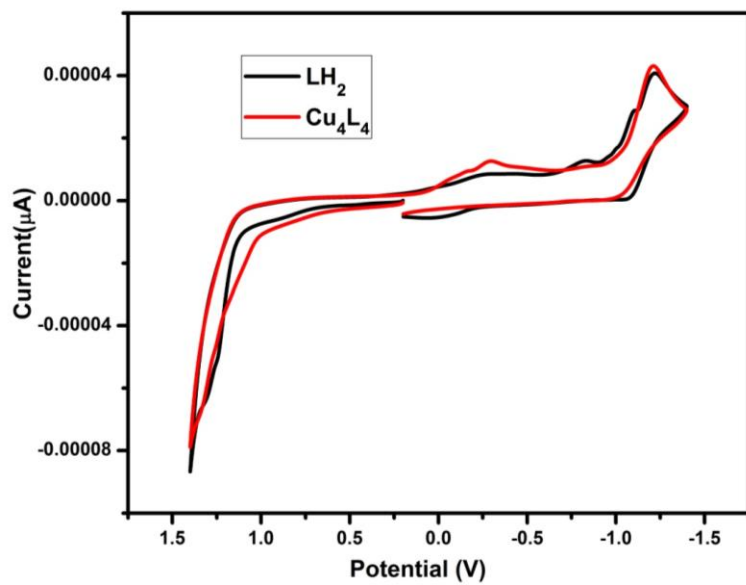

**Figure S8:** Cyclic voltammograms of  $\text{LH}_3$  and  $\text{Cu}_4(\text{LH})_4$  in DMF solution, with TBAP as supporting electrolyte, in glassy carbon electrode at  $100 \text{ mV/s}^{-1}$ .

**Table S1.** Selected bond lengths (Å) and bond angles (°) for the tetranuclear unit **Cu<sub>4</sub>(LH)<sub>4</sub>·4DMF**.

---

*Bond lengths*

|                      |           |
|----------------------|-----------|
| Cu1 N1               | 1.981(17) |
| Cu1 N8               | 2.000(18) |
| Cu1 N28 <sup>1</sup> | 1.974(19) |
| Cu1O42 <sup>1</sup>  | 2.060(15) |
| Cu1O51               | 2.213(17) |
| Cu2 N3               | 1.981(17) |
| Cu2 O17              | 2.029(15) |
| Cu2 N26              | 1.976(18) |
| Cu2 N33              | 1.974(17) |
| Cu2O56               | 2.254(17) |

*Bond angles*

|                                       |           |
|---------------------------------------|-----------|
| N1 Cu1 N8                             | 82.50(7)  |
| N1 Cu1 O42 <sup>1</sup>               | 176.66(7) |
| N1 Cu1 O51                            | 95.37(7)  |
| N8 Cu1 O42 <sup>1</sup>               | 98.51(6)  |
| N8 Cu1 O51                            | 95.13(7)  |
| N28 <sup>1</sup> Cu1 N1               | 97.31(7)  |
| N28 <sup>1</sup> Cu1 N8               | 163.44(8) |
| N28 <sup>1</sup> Cu1 O42 <sup>1</sup> | 80.80(7)  |
| N28 <sup>1</sup> Cu1 O51              | 101.36(7) |
| O42 <sup>1</sup> Cu1 O51              | 87.73(6)  |
| N3 Cu2 O17                            | 81.33 (7) |
| N3 Cu2O56                             | 92.19(7)  |
| O17 Cu2 O56                           | 92.54(6)  |
| N26 Cu2 N3                            | 98.61(7)  |
| N26 Cu2 O17                           | 160.09(7) |
| N26 Cu2 O56                           | 107.34(7) |
| N33 Cu2 N3                            | 171.96(8) |
| N33 Cu2 O17                           | 94.48(7)  |
| N33 Cu2 N26                           | 82.97(7)  |
| N33 Cu2 O56                           | 94.87 (7) |

---

<sup>1</sup>1 - x, 1 - y, 1 - z

**Table S2.** Selected calculated spin densities for the **Cu<sub>4</sub>(LH)<sub>4</sub>·4DMF** complex.

| Atom                                | Spin density (in e <sup>-</sup> ) |
|-------------------------------------|-----------------------------------|
| Cu1 = Cu3 <sup>a,b</sup>            | -0.6370                           |
| Cu2 = Cu4 <sup>a,b</sup>            | +0.6353                           |
| N1 <sub>imid</sub> <sup>a,b,c</sup> | -0.0756                           |
| N2 <sub>imid</sub> <sup>a,b,c</sup> | +0.0763                           |
| C1 <sub>imid</sub> <sup>a,b,c</sup> | -0.0002                           |
| C2 <sub>imid</sub> <sup>a,b,c</sup> | +0.0017                           |
| N1 <sub>benz</sub> <sup>a,b,d</sup> | -0.1203                           |
| N2 <sub>benz</sub> <sup>a,b,d</sup> | +0.1184                           |
| O1 <sub>benz</sub> <sup>a,b,d</sup> | -0.0511                           |
| O2 <sub>benz</sub> <sup>a,b,d</sup> | +0.0483                           |
| O1 <sub>DMF</sub> <sup>a,b,e</sup>  | -0.0020                           |
| O2 <sub>DMF</sub> <sup>a,b,e</sup>  | +0.0003                           |

<sup>a</sup> Label 1 applies for atoms attached to Cu1 and Cu3. Label 2 for atoms attached to Cu2 and Cu3. The carbon atoms appear as pair of negative and positive values. <sup>b</sup> Mean values. <sup>c</sup> Atoms of the imidazolyl moiety N-C-N. <sup>d</sup> Atoms of the benzamide moiety directly attached to the copper(II) ions. <sup>e</sup> The oxygen of the DMF solvent molecules.
